# Supplementary material
Source: HighWire-hosted journal article supplement (https://erj.ersjournals.com/content/57/3/2000612)
Supplement: inline-supplementary-material-1 [file inline-supplementary-material-1.pdf]

## Supplementary Material

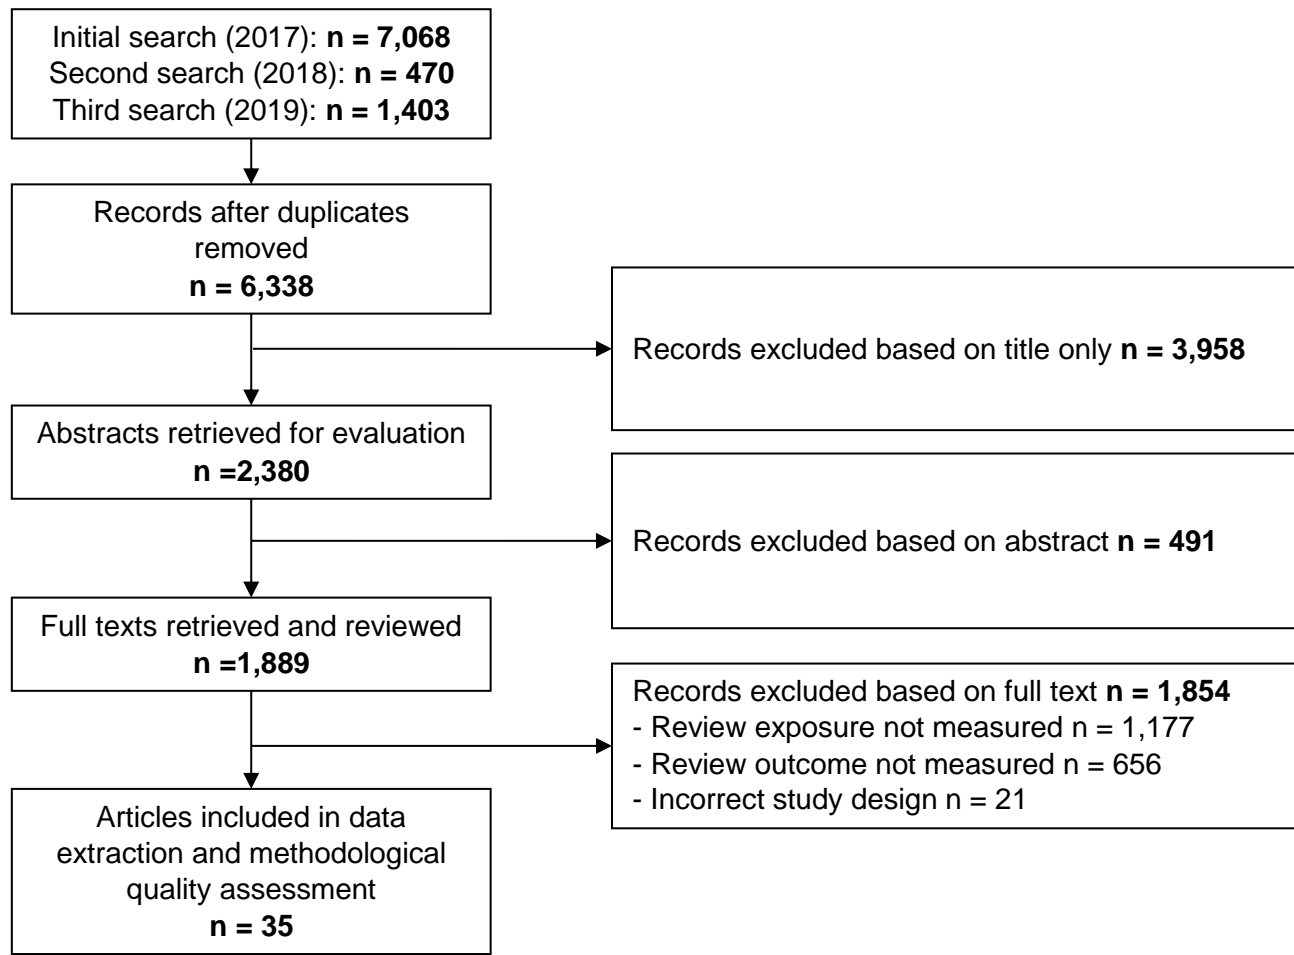

Preferred Reporting Items for Systematic Reviews and Meta-Analyses flowchart of articles for inclusion in a systematic review of the effect weight status on asthma medication use in asthma.
